# Supplementary material for: Graphene-wrapped nitrogen-doped hollow carbon spheres for high-activity oxygen electroreduction
Source: Royal Society of Chemistry journal article supplement (doi:10.1039/c8qm00160j), 2018-01-01
Supplement: c8qm00160j1.pdf [file c8qm00160j1.pdf]

## **Electronic Supplementary Information:**

# **Graphene-Wrapped Nitrogen-Doped Hollow Carbon Spheres for High-Activity Oxygen Electroreduction**

Ruguang Ma,<sup>a</sup> Ruohao Xing,<sup>a</sup> Gaoxin Lin,<sup>a</sup> Yao Zhou,<sup>a</sup> Qian Liu,<sup>a\*</sup> Minghui Yang,<sup>b\*</sup>  
Chun Hu,<sup>a</sup> Kang Yan,<sup>c</sup> and Jiacheng Wang<sup>a\*</sup>

<sup>a</sup> State Key Laboratory of High Performance Ceramics and Superfine Microstructure, Shanghai Institute of Ceramics, Chinese Academy of Sciences, 1295 Dingxi Road, Shanghai 200050, P. R. China.

<sup>b</sup> Ningbo Institute of Materials Technology and Engineering, Chinese Academy of Sciences, Ningbo 315201, P. R. China.

<sup>c</sup> State Key Laboratory of Mechanics and Control of Mechanical Structures, College of Aerospace Engineering, Nanjing University of Aeronautics and Astronautics, 29 Yudao Street, Nanjing 210016, P. R. China.

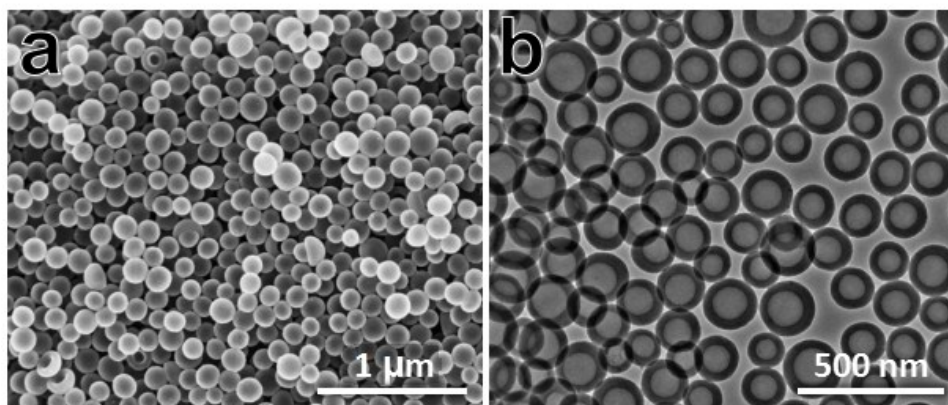

**Figure S1.** (a) SEM and (b) TEM images of HPSs.

**Table S1.** Textural properties of NGC-800, NGC-950, NGC-1100, NHCSs and NG.

| Sample   | $S_{\text{BJH}}^{\text{a}}$<br>( $\text{m}^2 \cdot \text{g}^{-1}$ ) | $V_{\text{tot}}^{\text{b}}$<br>( $\text{cm}^3 \cdot \text{g}^{-1}$ ) | Pore size <sup>c</sup><br>(nm) |
|----------|---------------------------------------------------------------------|----------------------------------------------------------------------|--------------------------------|
| NGC-800  | 819                                                                 | 0.99                                                                 | 2.4/ 42.9                      |
| NGC-950  | 722                                                                 | 0.85                                                                 | 2.8/ 8.1/ 42.9                 |
| NGC-1100 | 618                                                                 | 0.68                                                                 | 6.7/ 42.9                      |
| NHCSs    | 939                                                                 | 1.27                                                                 | 8.1/ 40.9                      |
| NG       | 119                                                                 | 0.35                                                                 | < 10                           |

a Determined by the BET method at  $P/P_0$  of 0.05-0.15.

b Total pore volume for pores at  $P/P_0$  of 0.99.

c determined by the BJH method from the desorption.

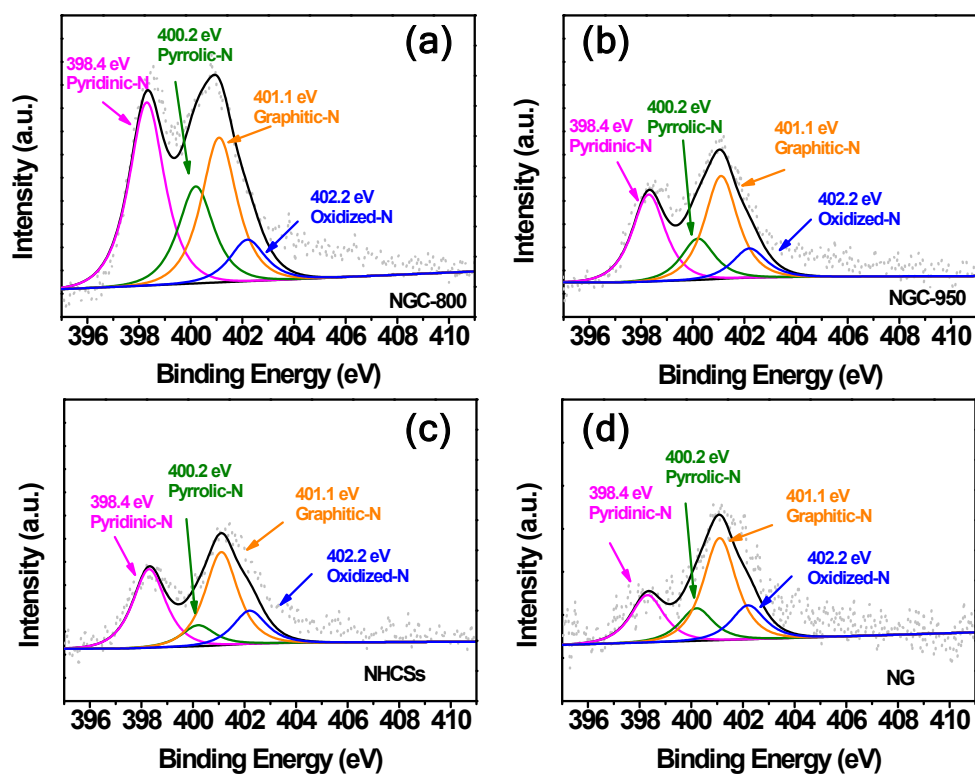

**Figure S2.** High-resolution N1s XPS spectra of (a) NGC-800, (b) NGC-950, (c) NHCSs and (d) NG.

**Table S2.** Elemental composition of NHCSs and NGCs determined by XPS analysis.

| Samples  | Carbon<br>(at.%) | Nitrogen<br>(at.%) | Oxygen<br>(at.%) | N/O<br>molar ratio |
|----------|------------------|--------------------|------------------|--------------------|
| NGC-800  | 88.74            | 7.96               | 3.30             | 2.41               |
| NGC-950  | 91.67            | 4.92               | 3.41             | 1.44               |
| NGC-1100 | 92.90            | 3.44               | 3.66             | 0.94               |
| NHCSs    | 94.35            | 3.88               | 1.77             | 2.19               |
| NG       | 93.05            | 2.65               | 4.30             | 0.59               |

**Table S3.** The peak position and relative composition of different nitrogen groups obtained from the N 1s signal.

| Sample   | Pyridine-N         |       | Pyrrolic-N         |       | Quaternary-N       |       | Pyridine-N-O       |       |
|----------|--------------------|-------|--------------------|-------|--------------------|-------|--------------------|-------|
|          | Peak position (eV) | at. % |
| NGC-800  | 398.3              | 36.3  | 400.2              | 19.7  | 401.1              | 35.8  | 402.2              | 7.9   |
| NGC-950  | 398.3              | 33.7  | 400.2              | 15.8  | 401.1              | 39.2  | 402.2              | 11.4  |
| NGC-1100 | 398.3              | 26.3  | 400.2              | 12.0  | 401.1              | 46.8  | 402.2              | 14.9  |
| NHCSs    | 398.3              | 38.7  | 400.2              | 11.0  | 401.1              | 35.2  | 402.2              | 16.1  |
| NG       | 398.3              | 21.9  | 400.2              | 15.1  | 401.1              | 47.3  | 402.2              | 15.7  |

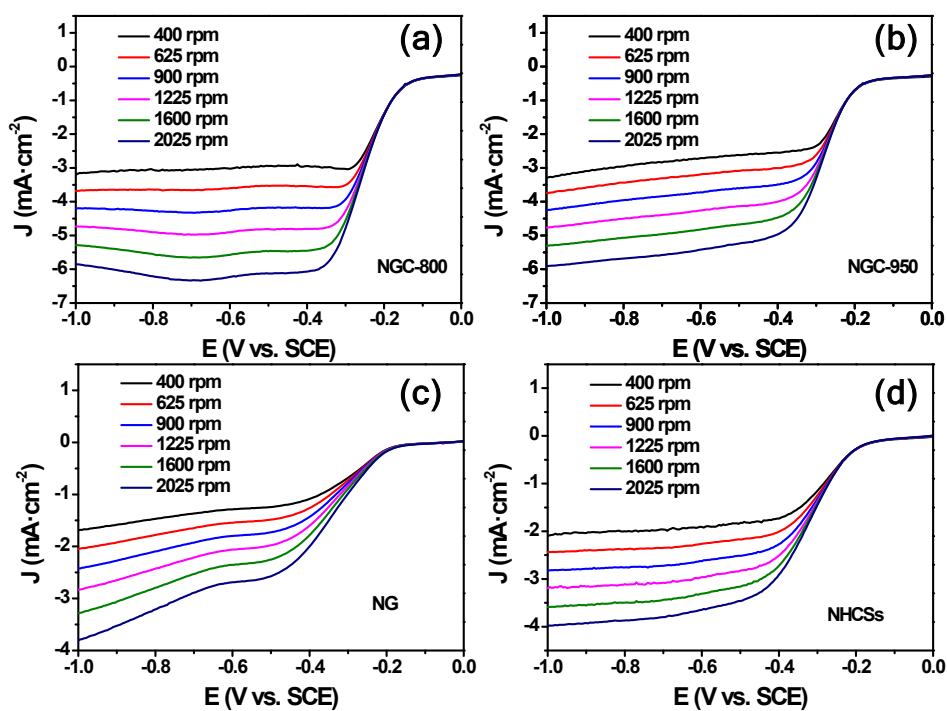

**Figure S3.** LSV curves of (a) NGC-800, (b) NGC-950, (c) NG-1100 and (d) NHCS-1100 at different rotation speeds obtained in  $\text{O}_2$ -saturated 0.1 M KOH solution.

**Table S4.** Comparison of the ORR performance of NGC-1100 and other metal-free nitrogen-doped electrocatalysts.

| Catalysts       | Mass loading (mg cm <sup>-2</sup> ) | E <sub>1/2</sub> -E <sub>1/2</sub> (Pt/C) (mV) | Current density (mA cm <sup>-2</sup> ) | n           | Ref.             |
|-----------------|-------------------------------------|------------------------------------------------|----------------------------------------|-------------|------------------|
| <b>NGC-1100</b> | <b>0.51</b>                         | <b>72</b>                                      | <b>5.7</b>                             | <b>3.91</b> | <b>This work</b> |
| NP-PG           | 0.15                                | 90                                             | 4.4                                    | 3.7-4.0     | <sup>1</sup>     |
| PM-CNP          | 0.29                                | 100                                            | 6.0                                    | 3.5         | <sup>2</sup>     |
| B,N-G           | 0.28                                | 80                                             | 5.01                                   | 3.8         | <sup>3</sup>     |
| HCH900          | 0.46                                | 81                                             | 4.2                                    | 3.82        | <sup>4</sup>     |
| NCHCs           | 0.4                                 | 61                                             | 6.5                                    | 3.6-3.8     | <sup>5</sup>     |
| NHCS-1000       | 0.5                                 | 49                                             | 5.2                                    | 3.87-3.98   | <sup>6</sup>     |
| N-CNF           | 0.4                                 | 50                                             | 5.2                                    | 3.97        | <sup>7</sup>     |
| HAZ-800         | /                                   | 48                                             | 3.55                                   | 3.60        | <sup>8</sup>     |

**References for Electronic Supplementary Information:**

1. X. Wang, Y. Liu and P. Wu, *Chem. Eng. J.*, 2017, **328**, 417.
2. G. Zhu, T. Chen, Y. Hu, L. Ma, R. Chen, H. Lv, Y. Wang, J. Liang, X. Li, C. Yan, H. Zhu, H. Liu, Z. Tie, Z. Jin and J. Liu, *Nano Energy*, 2017, **33**, 229.
3. Y. Zheng, Y. Jiao, L. Ge, M. Jaroniec and S. Z. Qiao, *Angew. Chem.*, 2013, **125**, 3192.
4. C. Han, J. Wang, Y. Gong, X. Xu, H. Li and Y. Wang, *J. Mater. Chem. A*, 2014, **2**, 605.
5. X. Zheng, X. Cao, X. Li, J. Tian, C. Jin and R. Yang, *Nanoscale*, 2017, **9**, 1059.
6. T. Zhou, Y. Zhou, R. Ma, Z. Zhou, G. Liu, Q. Liu, Y. Zhu and J. Wang, *Carbon*, 2017, **114**, 177.
7. H.-W. Liang, Z.-Y. Wu, L.-F. Chen, C. Li and S.-H. Yu, *Nano Energy*, 2015, **11**, 366.
8. S. Gao, H. Fan and S. Zhang, *J. Mater. Chem. A*, 2014, **2**, 18263.
